# Supplementary material
Source: Springer Nature journal article supplement (https://www.springermedizin.de/resource/supplementary/13049_2010_174_MOESM4_ESM.pdf/9666034)

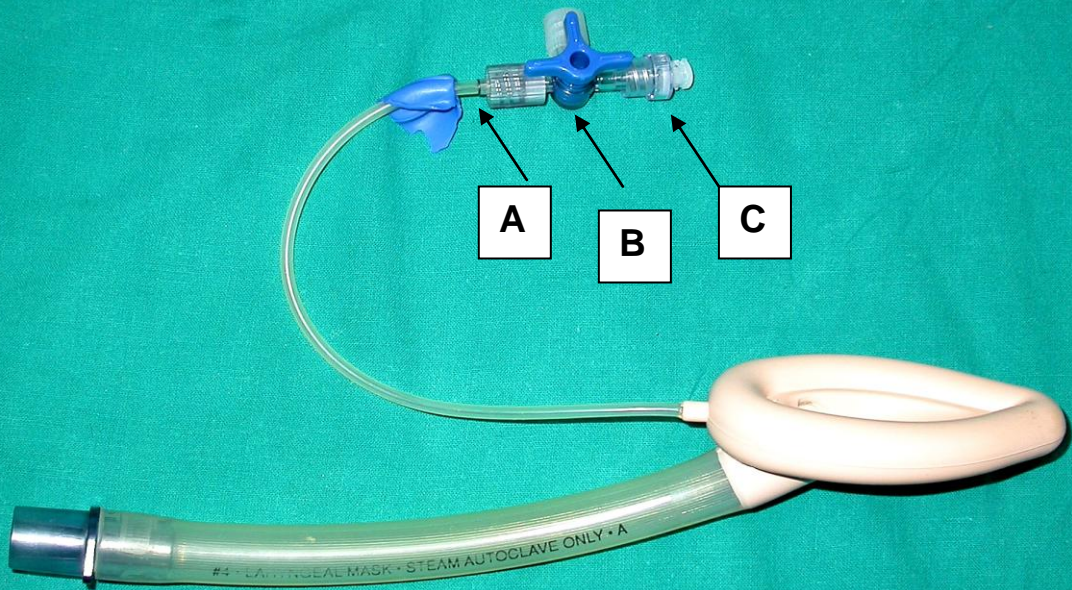

A

B

C

#4 • LARYNGEAL MASK • STEAM AUTOCLAVE ONLY • A

Supplement: MOESM4 [file 9666034]
